# Supplementary material for: Antioxidant and Antiaging Properties of a Novel Synergistic Nutraceutical Complex: Readouts from an In Cellulo Study and an In Vivo Prospective, Randomized Trial
Source: MDPI journal article supplement (doi:10.3390/antiox11030468), 2022-02-26
Supplement: s1 [file s1]

**Supplementary Table S1.** Primer sequences for Real-time PCR.

| Primer   | Sequence                     | Target Template                                                                        | Ascension number of target templates                                                                                                    | Product Length |
|----------|------------------------------|----------------------------------------------------------------------------------------|-----------------------------------------------------------------------------------------------------------------------------------------|----------------|
| hGAPDH-R | 5'-CATGGGTGGAATCATATTGGAA-3' | H. sapiens glyceraldehyde-3-phosphate dehydrogenase (GAPDH), transcript variants, mRNA | <a href="#">NM_001289745.3</a> ,<br><a href="#">NM_001289746.2</a> ,<br><a href="#">NM_002046.7</a>                                     | 155            |
| hβ5-R    | 5'-CATCTCTGTAGGTGGCTTGGT-3'  | H. sapiens proteasome 20S subunit beta 5 (PSMB5/β5), transcript variants, mRNA         | <a href="#">NM_001144932.3</a> ,<br><a href="#">NM_002797.5</a> ,<br><a href="#">NM_001130725.1</a>                                     | 119            |
| hα7-R    | 5'-ACAGCCCCAATAACCGTATG-3'   | H. sapiens proteasome 20S subunit alpha 3 (PSMA3/α7), transcript variant 1, mRNA       | <a href="#">NM_002788.4</a>                                                                                                             | 104            |
| hRpt6-R  | 5'-GGATGCTTAACAGGCAGCTC-3'   | Homo sapiens proteasome 26S subunit, ATPase 5 (PSMC5/RPT6), transcript variant 2, mRNA | <a href="#">NM_001199163.2</a> ,<br><a href="#">NM_002805.6</a> ,<br><a href="#">XM_024450841.1</a> ,<br><a href="#">XM_024450840.1</a> | 139            |
| hRpt6-F  | 5'-TCCTGCCCAACAAGGTAGAC-3'   |                                                                                        |                                                                                                                                         |                |

**Supplementary Table S2.** Technical details of each component of the composition

|                    | <i>Linum usitatissimum</i> L.    | <i>Silybum marianum</i>     | <i>Cynara scolymus</i> L.                                        | <i>Pistacia Lentiscus</i> L. var. <i>Chia</i> |
|--------------------|----------------------------------|-----------------------------|------------------------------------------------------------------|-----------------------------------------------|
| Extraction solvent | Ethanol/Water (30/70)            | Water/Ethanol (20/80 V/V)   | Water                                                            | N/A                                           |
| Preparation type   | Dry extract                      | Dry extract                 | Dry extract                                                      | Air-dry                                       |
| Part of plant used | Seeds                            | Seeds                       | Leaves                                                           | Resin                                         |
| Description        | Fine powder                      | Powder                      | Powder                                                           | Powder                                        |
| Color              | Brown/yellowish-brown            | Light yellow                | Brownish                                                         | Whitish to light yellow                       |
| Odor               | Neutral and slight sweet         | Without characteristic odor | Characteristic                                                   | Characteristic of Chios Mastiha aroma.        |
| Taste              | Characteristic                   | Characteristic              | Characteristic                                                   | Characteristic                                |
| Assay:             | Lignans (as SDG) > 20% (HPLC-UV) | Min. 50% Silymarin (HPLC)   | Caffeolquinics acids expressed in chlorogenic acid 5-7.2% (HPLC) | Isomasticadienonic acid 12-15% (HPLC)         |

A)

| Extract Combination | Linum usitatissimum (in µg/ml) | Silybum marianum (in µg/ml) | Cynara scolymus (in µg/ml) | Pistacia lentiscus (% v/v) |
|---------------------|--------------------------------|-----------------------------|----------------------------|----------------------------|
| 1                   | 20                             | 10                          | 20                         | 0,05                       |
| 2                   | 10                             | 5                           | 10                         | 0,025                      |
| 3                   | 5                              | 2,5                         | 5                          | 0,0125                     |
| 4                   | 20                             | 2,5                         | 5                          | 0,0125                     |
| 5                   | 5                              | 10                          | 5                          | 0,0125                     |
| 6                   | 5                              | 2,5                         | 20                         | 0,0125                     |
| 7                   | 5                              | 2,5                         | 5                          | 0,1                        |
| 8                   | 10                             | 10                          | 10                         | 0,05                       |

B)

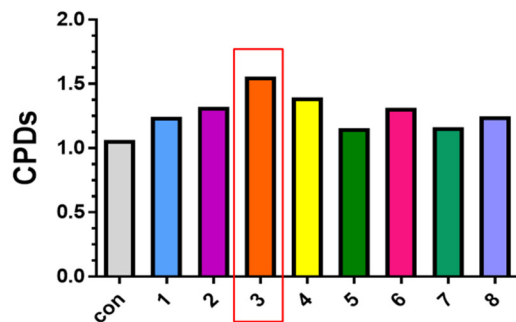

D) i)

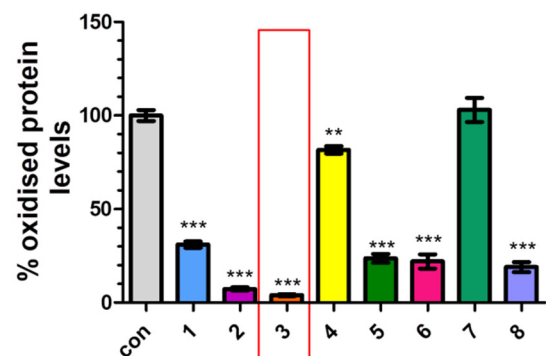

C)

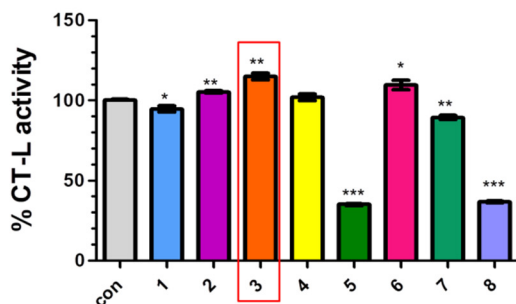

ii)

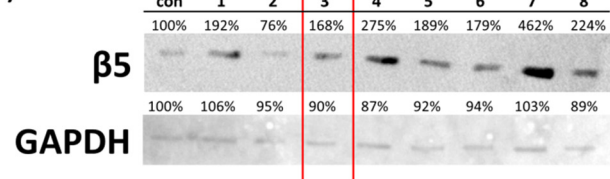

**Supplementary Figure S1: Assessment of short term effects of different extract combinations in primary human cell cultures.** (A) Table indicating the ingredients of each tested extract combination (1–8). (B) Number of cumulative population doublings (CPDs), (C) % CT-L activities, and (D) (i) analysis of carbonylated proteins and (ii) immunoblot analysis of the catalytic proteasome β5 subunit in total cell extracts from human fibroblasts treated with extracts combinations or the solvent (control), for 72h. GAPDH was used as control for equal protein loading. The signal in control cells was arbitrarily set to 100%. \*\*\*:  $p < 0.001$ , \*\*:  $p < 0.01$ , \*:  $p < 0.05$ .

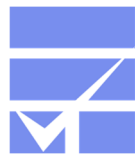

# CONSORT

TRANSPARENT REPORTING of TRIALS

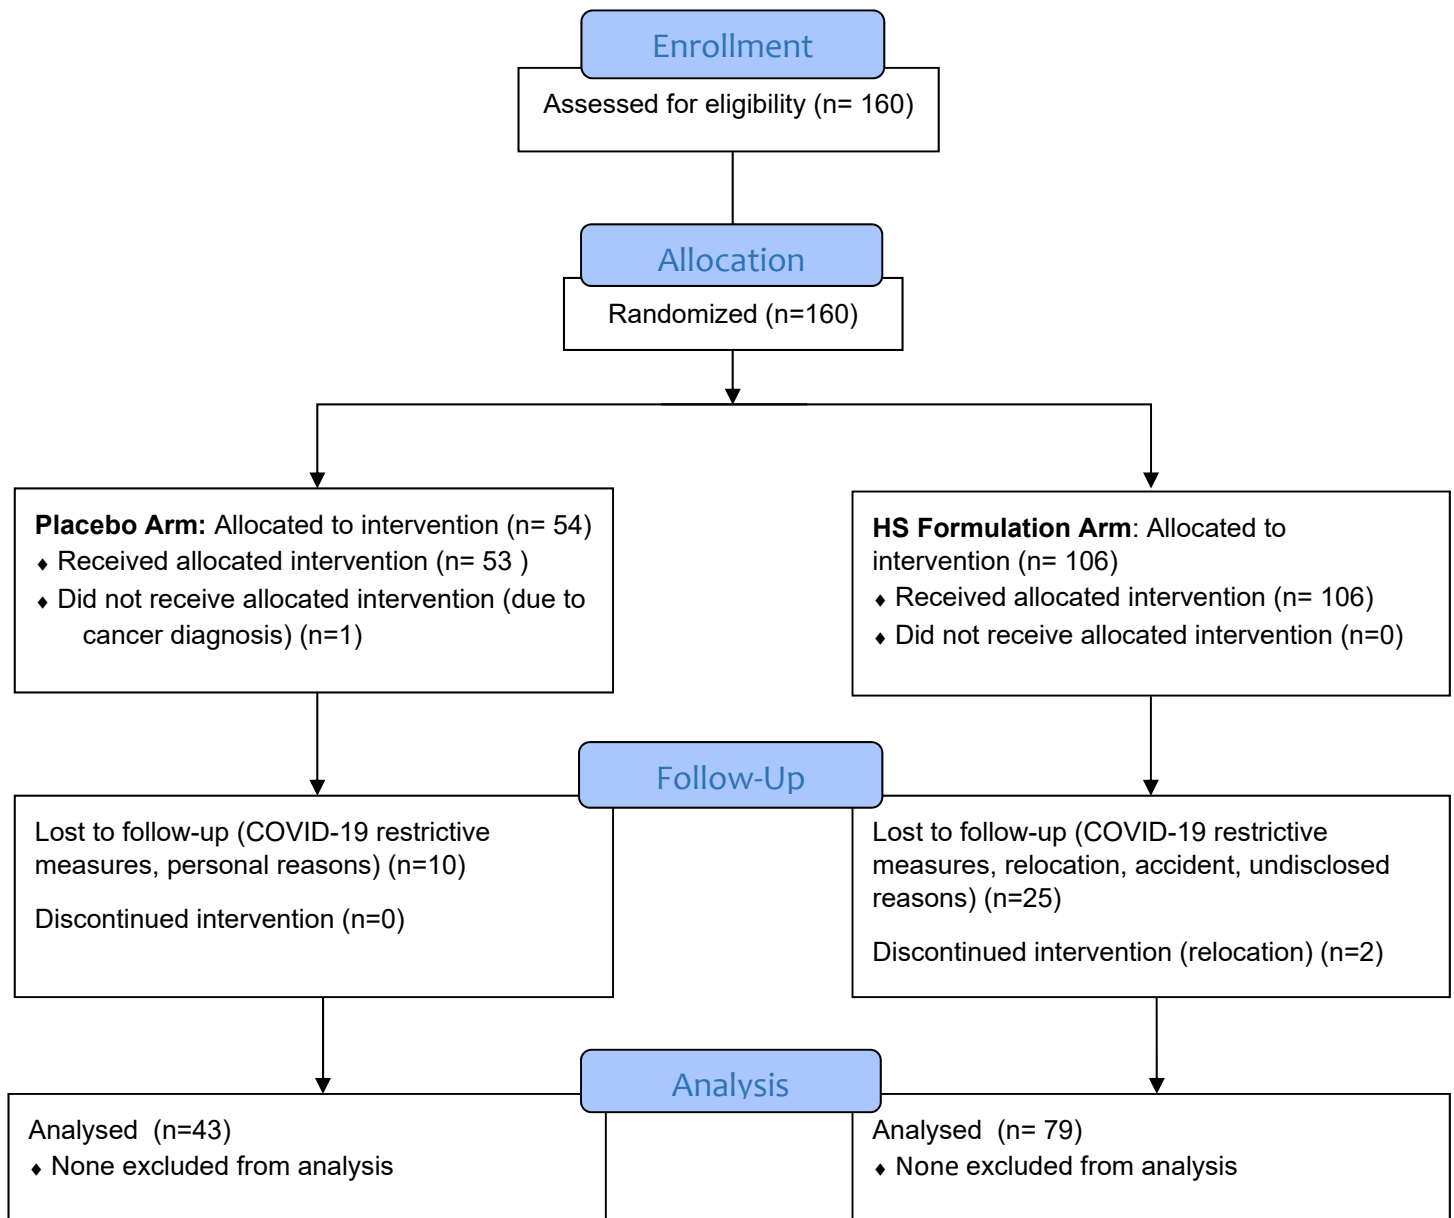

Supplementary Figure S2: CONSORT 2010 Flow Diagram.
